# Supplementary material for: PAK3 promotes the metastasis of hepatocellular carcinoma by regulating EMT process
Source: PubMed Central journal article supplement (PMC8692680; doi:10.7150/jca.61918), 2022-01-01
Supplement: jcav13p0153s1.pdf [file jcav13p0153s1.pdf]

### Supplementary Table 1

Clinicopathologic Features of HCC Patients ( n=20)

---

|                              |          |    |
|------------------------------|----------|----|
| Gender                       | Male     | 15 |
|                              | Female   | 5  |
| Age                          | ≤ 50     | 7  |
|                              | > 50     | 13 |
| AFP (μg/L)                   | ≤ 20     | 4  |
|                              | > 20     | 16 |
| HBV                          | Positive | 11 |
|                              | Negative | 9  |
| Tumor size(cm)               | ≤ 5      | 6  |
|                              | > 5      | 14 |
| Capsular invasion            | Yes      | 14 |
|                              | No       | 6  |
| Intrahepatic metastasis      | Yes      | 9  |
|                              | No       | 11 |
| Distant metastasis           | Yes      | 7  |
|                              | No       | 13 |
| Pathological differentiation | I-II     | 8  |
|                              | III-IV   | 12 |

---
